# Supplementary material for: Rupture mechanism of liquid crystal thin films realized by large-scale molecular simulations
Source: Royal Society of Chemistry journal article supplement (doi:10.1039/c3nr05413f), 2013-11-11
Supplement: c3nr05413f.pdf [file c3nr05413f.pdf]

# Supporting Information

“Rupture mechanism of liquid crystal thin films realized by  
large-scale molecular simulations”

Trung Dac Nguyen, Jan-Michael Y. Carrillo, Michael A. Matheson and W. Michael Brown

*National Center for Computational Sciences  
Oak Ridge National Laboratory, Tennessee 37831*

# Visualization method

- We implemented a path tracer that supports lighting, materials, depth cueing, motion blur and shadows for multi-million particle systems.
- Simulation snapshots are generated from offline simulation data.
- MD trajectories are visualized using the OLCF Visualization Laboratory facility.



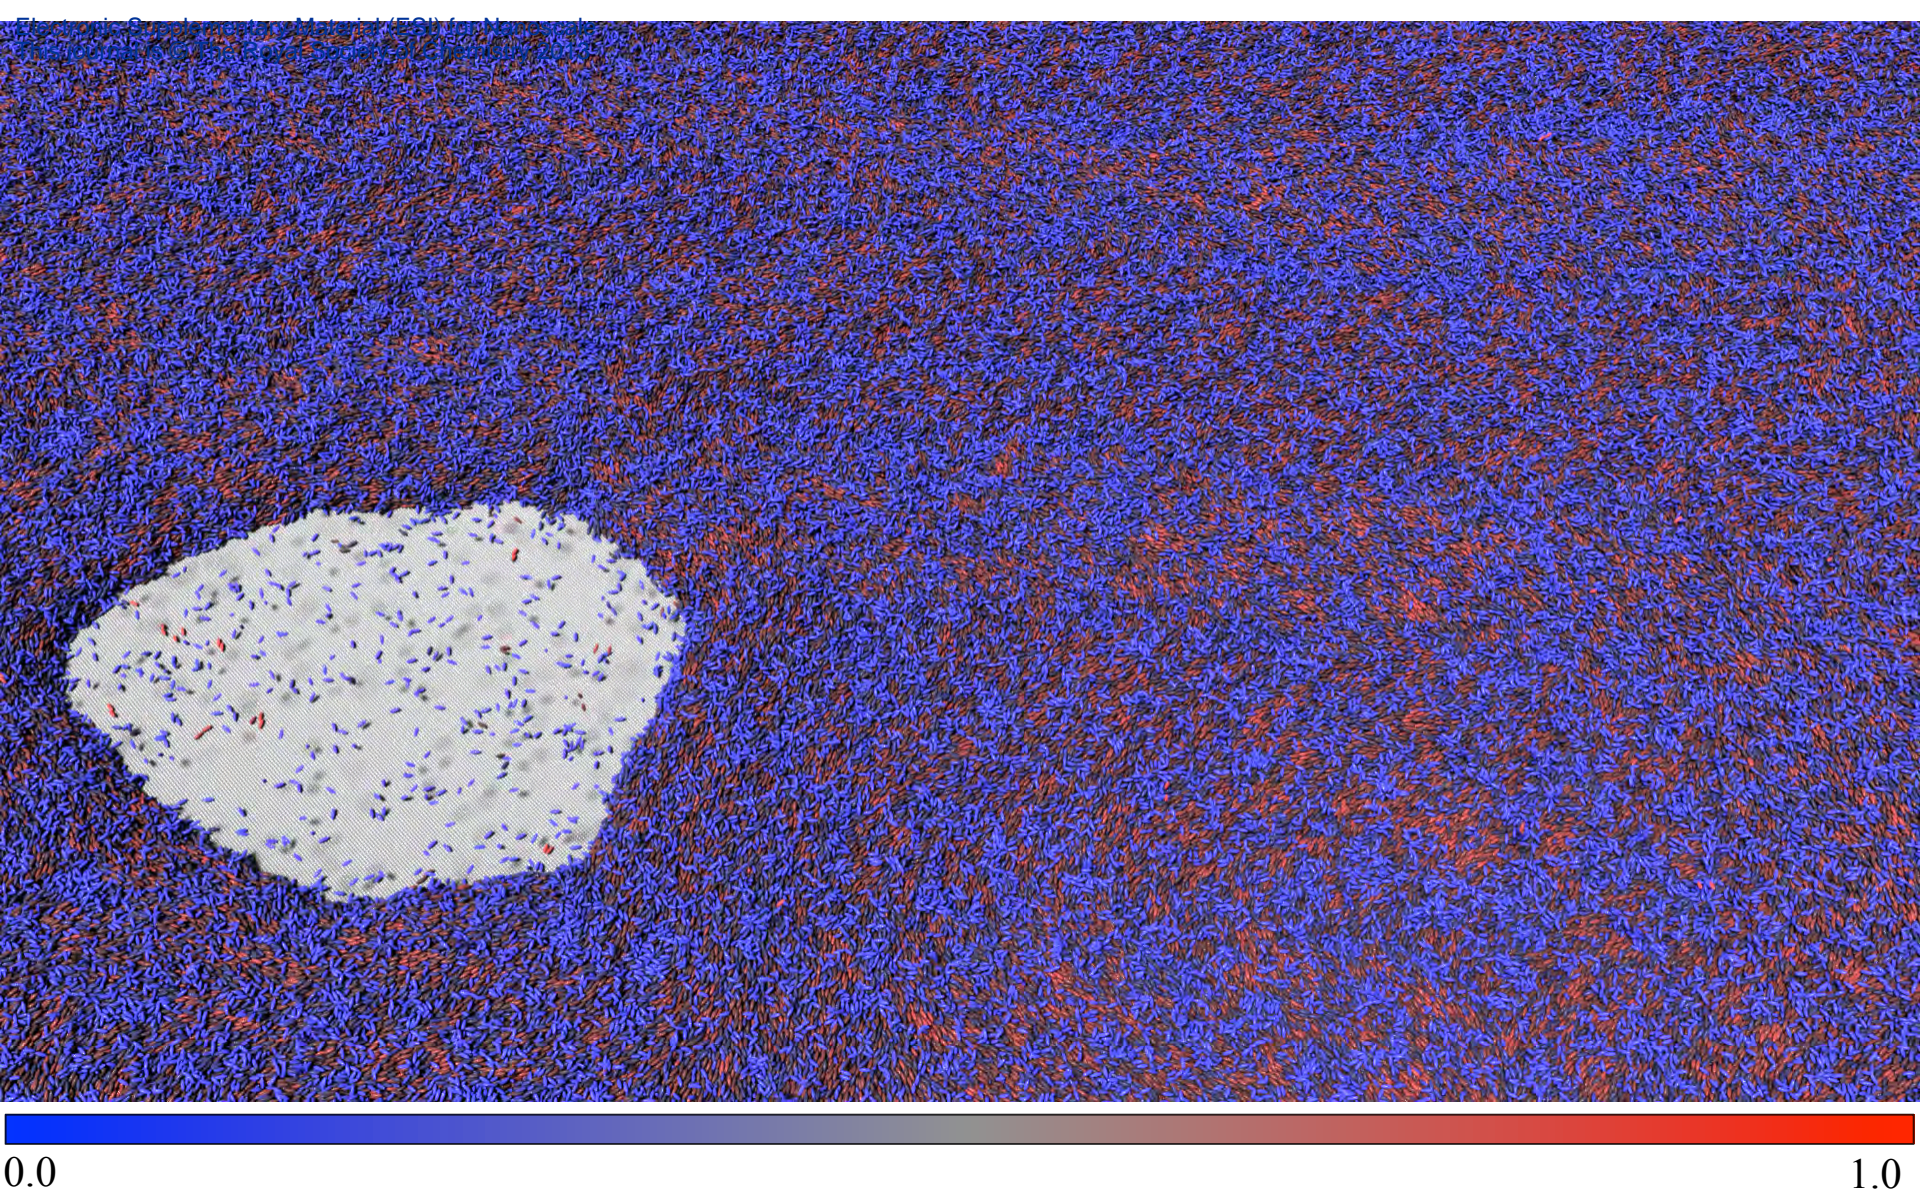

Figure S1: Zoomed-in perspective view of a hole in the nematic  $h_0 = 8.0\sigma_0$  film: LC mesogens are colored by their local alignment parameter: red = good local alignment with their neighbors, blue = poor alignment. Substrate particles are not shown. Only LC mesogens in the liquid phase ( $z < 12.0\sigma_0$ ) are visualized.



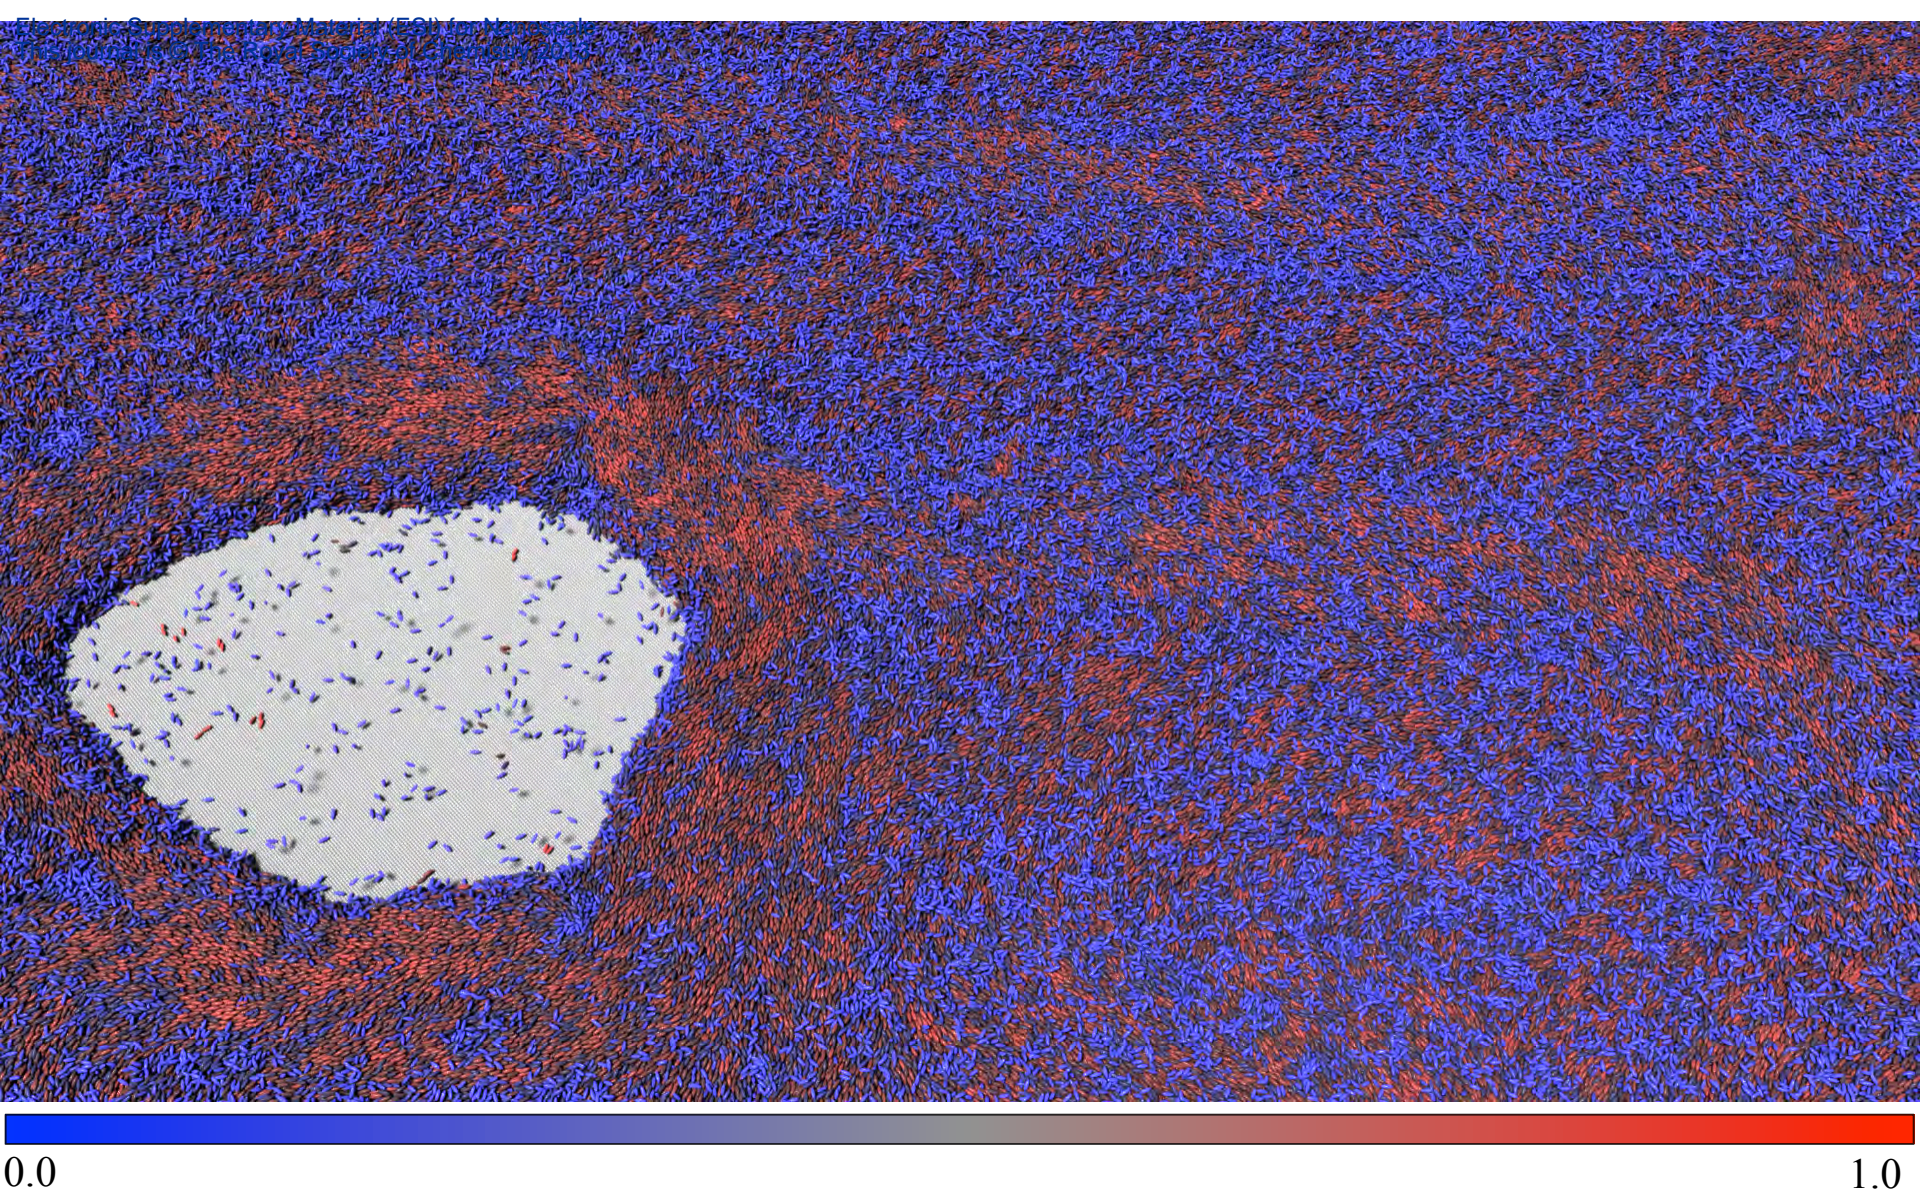

Figure S2: Zoomed-in perspective view of a hole in the nematic  $h_0 = 8.0\sigma_0$  film: LC mesogens are colored by their local alignment parameter: red = good local alignment with their neighbors, blue = poor alignment. Substrate particles are not shown. Only LC mesogens with  $z < 9.0\sigma_0$  are visualized to further reveal the orientational ordering within the liquid phase.



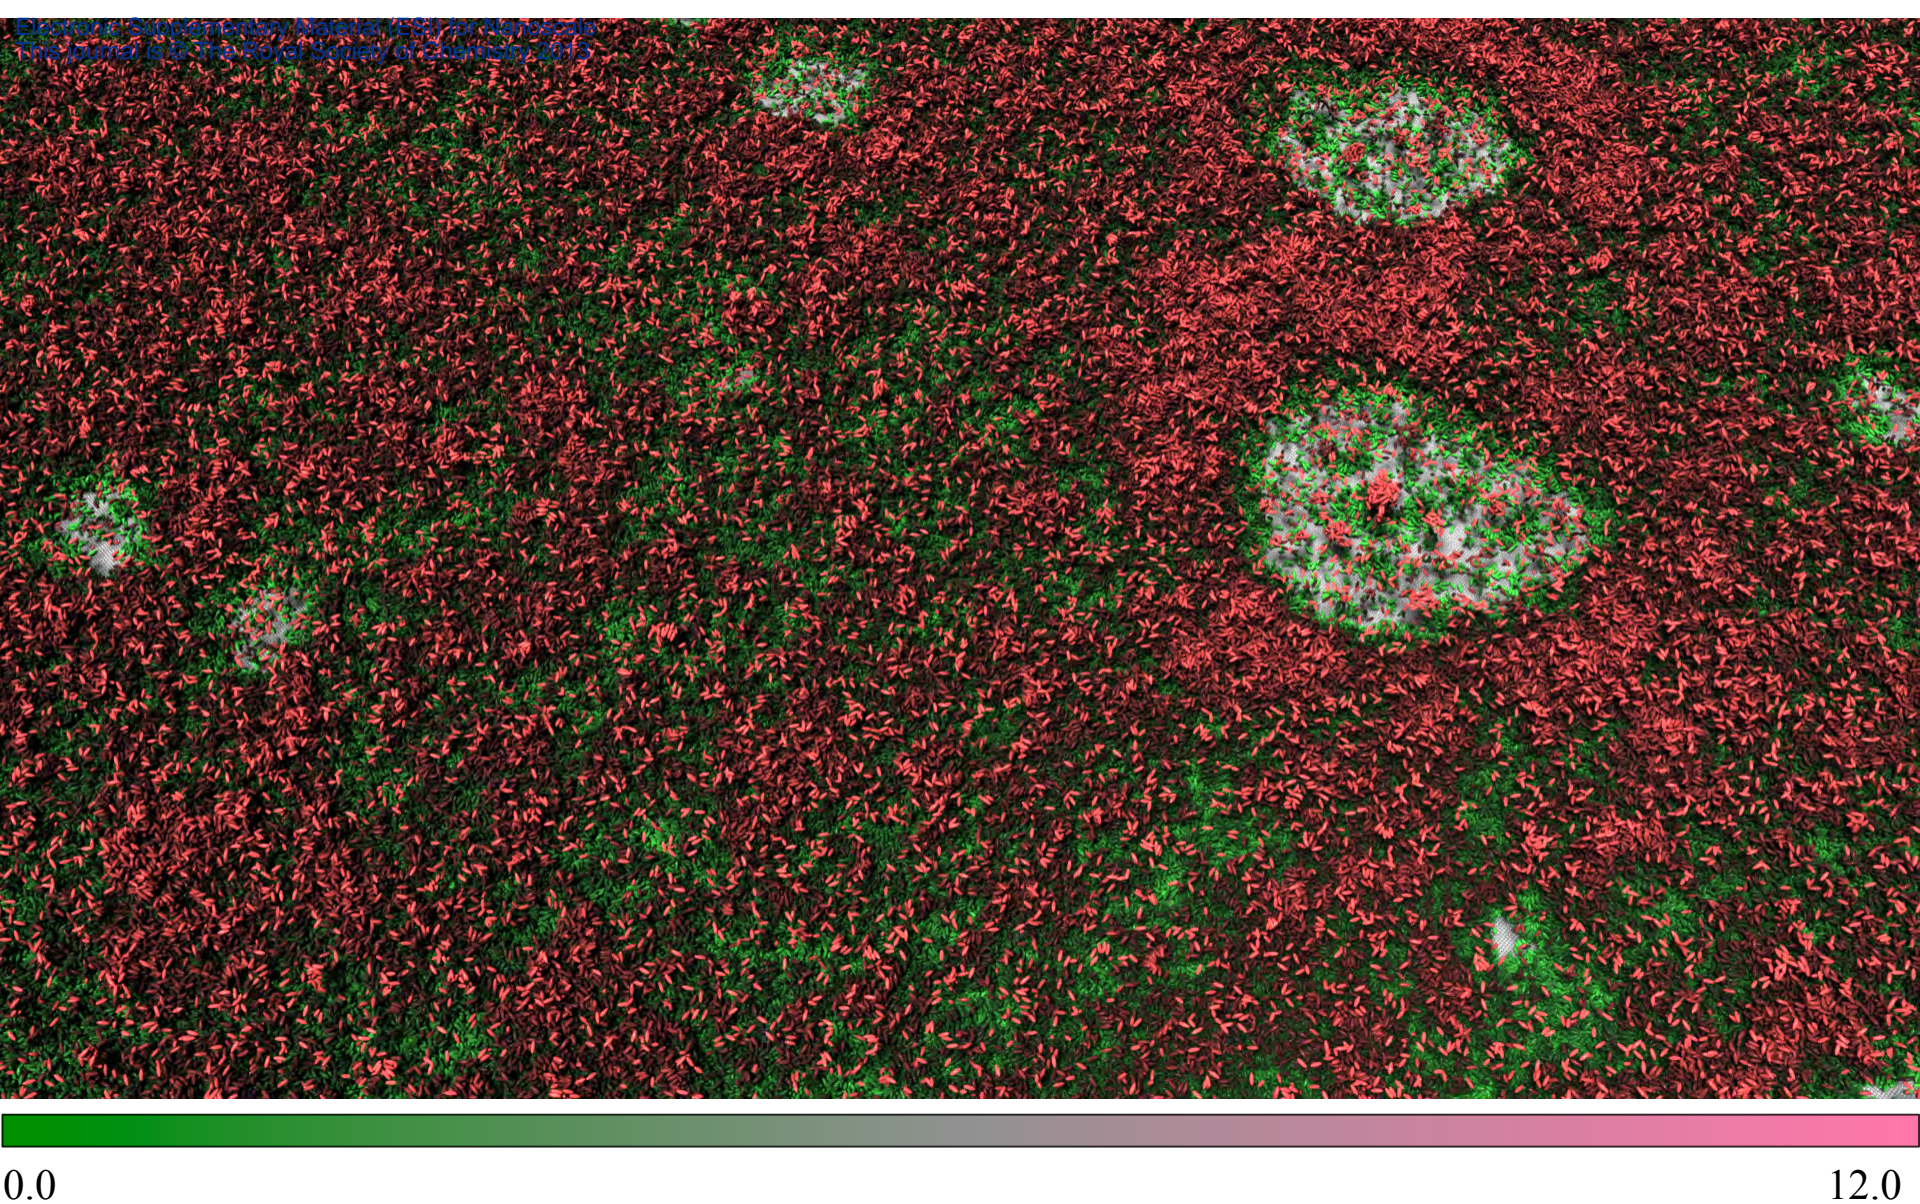

Figure S3: Zoomed-in perspective view of the isotropic  $h_0 = 8.0\sigma_0$  film: LC mesogens are colored by their  $z$  coordinate. Substrate particles are not shown. Only LC mesogens with  $z < 12.0\sigma_0$  are visualized.
